# Supplementary material
Source: PubMed Central journal article supplement (PMC2030636)
Supplement: NIHMS26304-supplement-01.pdf [file NIHMS26304-supplement-01.pdf]

# Online Data Supplement

Calsequestrin Mutation and Catecholaminergic  
Polymorphic Ventricular Tachycardia:  
A Simulation Study of Cellular Mechanism

by  
Gregory M. Faber<sup>1</sup> and Yoram Rudy<sup>2</sup>

Department of Biomedical Engineering, Case Western  
Reserve University<sup>1</sup>, Cleveland, OH 44106-7207  
Cardiac Bioelectricity and Arrhythmia Center and  
Department of Biomedical Engineering, Washington  
University<sup>2</sup>, St. Louis, MO 63130-4899

**Running Title:**

CASQ2 Mutation and Spontaneous Calcium Release

**Word Count:**

N/A

**Address correspondence and reprint requests to:**

Yoram Rudy, Director  
Cardiac Bioelectricity and Arrhythmia Center  
290 Whitaker Hall  
Campus Box 1097,  
One Brookings Drive,  
St. Louis, MO 63130-4899, USA  
Tel: (314) 935-8160  
Fax: (314) 935-8168  
Email: [rudy@wustl.edu](mailto:rudy@wustl.edu)

**DEFINITIONS AND ABBREVIATIONS**

|                          |                                                                         |
|--------------------------|-------------------------------------------------------------------------|
| AP                       | Action potential                                                        |
| APD <sub>90</sub>        | Action potential duration measured at 90% repolarization                |
| CL                       | Cycle length                                                            |
| RMP                      | Resting membrane potential                                              |
| Ca <sub>v</sub> 1.2      | L-type Ca <sup>2+</sup> channel                                         |
| RyR                      | Ryanodine receptor SR Ca <sup>2+</sup> release channel                  |
| CaT                      | Calcium transient                                                       |
| CICR                     | Calcium-induced calcium release                                         |
| SOICR                    | Store-over-load induced calcium release                                 |
| ISO                      | Isoproterenol                                                           |
| MOT                      | Mean Open Time                                                          |
| VDI                      | Voltage dependent inactivation                                          |
| CDI                      | Calcium dependent inactivation                                          |
| <i>ModeV</i>             | L-type Ca <sup>2+</sup> channel states in VDI gating mode               |
| <i>ModeCa</i>            | L-type Ca <sup>2+</sup> channel states in CDI gating mode               |
| <i>f<sub>Ca</sub></i>    | CDI gate                                                                |
| <i>Mode∅</i>             | L-type Ca <sup>2+</sup> channel states in a non-conducting mode         |
| <i>f<sub>M∅</sub></i>    | <i>Mode∅</i> gate                                                       |
| <i>CASQ2</i>             | Calsequestrin, Ca <sup>2+</sup> buffer in JSR                           |
| <i>TRPN</i>              | Troponin, Ca <sup>2+</sup> buffer in myoplasm                           |
| <i>CMDN</i>              | Calmodulin, Ca <sup>2+</sup> buffer in myoplasm                         |
| SR                       | Sarcoplasmic reticulum                                                  |
| JSR                      | Junctional SR                                                           |
| NSR                      | Network SR                                                              |
| ss                       | Subspace                                                                |
| myo                      | Myoplasm                                                                |
| <i>I<sub>Ca(L)</sub></i> | Ca <sup>2+</sup> Current through L-type Ca <sup>2+</sup> channel, μA/μF |
| <i>I<sub>Ca,Na</sub></i> | Na <sup>+</sup> Current through L-type Ca <sup>2+</sup> channel, μA/μF  |
| <i>I<sub>Ca,K</sub></i>  | K <sup>+</sup> Current through L-type Ca <sup>2+</sup> channel, μA/μF   |
| <i>I<sub>Na</sub></i>    | Fast Na <sup>+</sup> Current, μA/μF                                     |
| <i>I<sub>Na,b</sub></i>  | Background Na <sup>+</sup> Current, μA/μF                               |
| <i>I<sub>Ca,b</sub></i>  | Background Ca <sup>2+</sup> Current, μA/μF                              |
| <i>I<sub>Ca(T)</sub></i> | T-Type Ca <sup>2+</sup> Current, μA/μF                                  |

|                   |                                                                      |
|-------------------|----------------------------------------------------------------------|
| $I_{Kr}$          | Rapid delayed rectifier $K^+$ current, $\mu A/\mu F$                 |
| $I_{Ks}$          | Slow delayed rectifier $K^+$ current, $\mu A/\mu F$                  |
| $I_{K1}$          | Time independent $K^+$ current, $\mu A/\mu F$                        |
| $I_{Kp}$          | Plateau $K^+$ Current, $\mu A/\mu F$                                 |
| $I_{NaCa}$        | $Na^+$ - $Ca^{2+}$ Exchanger in myoplasm, $\mu A/\mu F$              |
| $I_{NaCa,ss}$     | $Na^+$ - $Ca^{2+}$ Exchanger in subspace, $\mu A/\mu F$              |
| $I_{NaK}$         | Sodium-Potassium Pump, $\mu A/\mu F$                                 |
| $I_{p,Ca}$        | Sarcolemmal $Ca^{2+}$ Pump, $\mu A/\mu F$                            |
| $I_{rel}$         | $Ca^{2+}$ release from JSR to subspace, mM/ms                        |
| $I_{up}$          | $Ca^{2+}$ uptake from myoplasm to SR, mM/ms                          |
| $I_{leak}$        | $Ca^{2+}$ leak from NSR to myoplasm, mM/ms                           |
| $I_{tr}$          | $Ca^{2+}$ transfer from NSR to JSR, mM/ms                            |
| $I_{diff}$        | $Ca^{2+}$ transfer from subspace to myoplasm, mM/ms                  |
| $P_s$             | Membrane permeability to ion S, cm/s                                 |
| $\bar{I}_x$       | Maximum current carried through channel x, $\mu A/\mu F$             |
| $V_m$             | Transmembrane potential, mV                                          |
| $z_s$             | Valence of ion S                                                     |
| $E_x$             | Reversal potential of current x, mV                                  |
| $[S]_o$           | Extracellular concentration of ion S, mM                             |
| $[S]_i$           | Intracellular concentration of ion S, mM                             |
| $[S]_{ss}$        | Subspace concentration of ion S, mM                                  |
| $[Ca^{2+}]_{JSR}$ | $Ca^{2+}$ concentration in JSR (unbound $Ca^{2+}$ ), mM              |
| $[Ca^{2+}]_{NSR}$ | $Ca^{2+}$ concentration in NSR, mM                                   |
| Mito              | Mitochondria                                                         |
| $[Ca^{2+}]_m$     | $Ca^{2+}$ concentration within the mitochondria, mM                  |
| $\beta_{mito}$    | Free vs. total $Ca^{2+}$ concentration ratio within the mitochondria |
| $\rho_{mito}$     | Volume ratio between mitochondria and cytosol                        |
| $k_{in}$          | Maximum rate of $Ca^{2+}$ influx into mitochondria, mM/ms            |
| $k_{out}$         | Maximum rate of $Ca^{2+}$ efflux into mitochondria, $ms^{-1}$        |
| $K_{mMito}$       | Half-saturation for $Ca^{2+}$ uptake into mitochondria, $\mu M$      |

$J_{inMito}$   $Ca^{2+}$  flux into mitochondria, mM/ms  
 $J_{outMito}$   $Ca^{2+}$  flux out of mitochondria, mM/ms

## ADDITIONAL METHODS

### Simulation of Isoproterenol (ISO) Effects

In addition to its effects on  $\text{Ca}_v1.2$ , ISO also affects several other channels. In our simulations we include the effects of a saturating concentration of ISO ( $\geq 0.1 \mu\text{M}$ ) on the slow delayed rectifier  $\text{K}^+$  current ( $I_{\text{Ks}}$ ), the  $\text{Na}^+$ - $\text{K}^+$  pump ( $I_{\text{NaK}}$ ), the inwardly rectifying  $\text{K}^+$  current ( $I_{\text{K1}}$ ), and the SR  $\text{Ca}^{2+}$  ATPase ( $I_{\text{up}}$ ). The increase in  $I_{\text{Ks}}$  magnitude following  $\beta$ -adrenergic stimulation has been well established [1, 2] with Bosch et al. [3] observing an 80% increase in current amplitude compared to control in the presence of  $0.1 \mu\text{M}$  ISO. The magnitude of  $I_{\text{NaK}}$  has been observed to increase in the presence of cAMP-increasing drugs; 133% of control in guinea pig ventricular myocytes in the presence of  $4 \mu\text{M}$  forskolin [4] and 140% of control in rat ventricular myocytes in the presence of  $1 \mu\text{M}$  isoproterenol [5]. In this study, we increase  $I_{\text{NaK}}$  conservatively by 30%. The effect of isoproterenol on  $I_{\text{K1}}$  is a reduction of the inward rectification of the current [6, 7], which reduces the current magnitude at hyperpolarized potentials. We include this effect on  $I_{\text{K1}}$  as detailed in the **Equations**. In a study in mice ventricular myocytes, Li et al. [8] observed a 30% decrease in the time constant of relaxation of the CaT in the presence of  $1 \mu\text{M}$  ISO and in a study by Chaudhri et al. [9] in rabbit ventricular myocytes, a 30% decrease in the time to 50% relaxation ( $\text{RT}_{50}$ ) of the CaT was observed in the presence of  $1 \mu\text{M}$  ISO. We increase  $I_{\text{up}}$  by 20% and achieve a 20% decrease in the time constant of relaxation of the CaT and a 20% decrease in the  $\text{RT}_{50}$  of the CaT at  $\text{CL} = 1500 \text{ ms}$ . The modifications to the model equations reflecting these effects of ISO are detailed in the **Equations**.

### Store-Overload-Induced $\text{Ca}^{2+}$ Release (SOICR)

We modify the RyR model to allow for SOICR. The formulation is a function of the concentration of free  $\text{Ca}^{2+}$  in the junctional SR ( $[\text{Ca}^{2+}]_{\text{JSR}}$ ) as proposed by Jiang et al. [10]. It should be noted that in this formulation (see **Equations**) the time constant associated with the SOICR function ( $\text{soicr}_\tau$ ) is not a determinant of the frequency of spontaneous release but instead defines the duration of the spontaneous release event. Without this time constant, when  $[\text{Ca}^{2+}]_{\text{JSR}}$  reaches the threshold for spontaneous release, a small amount of  $\text{Ca}^{2+}$  will be released and then  $[\text{Ca}^{2+}]_{\text{JSR}}$  will drop below the threshold, terminating release. This is not observed experimentally; instead the initiation of a SR release event leads to a larger, more unified release of SR  $\text{Ca}^{2+}$  through communication between diadic spaces via  $\text{Ca}^{2+}$  waves [11, 12]. For the purpose of this study, this process is represented at a macroscopic level by  $\text{soicr}_\tau$ . This representation is successful in generating SOICR events that result in DADs with amplitude and duration similar to those observed experimentally [13-16]. The incidence and frequency of SOICR events is a function of the total cellular  $\text{Ca}^{2+}$ , the rate of SR  $\text{Ca}^{2+}$  uptake, the rate of SR  $\text{Ca}^{2+}$  leak, and the amount of CASQ2 available to bind  $\text{Ca}^{2+}$ .

Although we utilize elevated luminal  $\text{Ca}^{2+}$  as the indicator for the initiation of SOICR, it is possible that the initiation SOICR occurs due to increased RyR opening as a result of elevated cytoplasmic  $\text{Ca}^{2+}$ . Following the application of ISO, we observe an increase in both peak and diastolic  $[\text{Ca}^{2+}]_i$ . Satoh et al. [17] observed increased occurrence of sparks in rabbit myocytes when diastolic  $[\text{Ca}^{2+}]_i$  was elevated. Our model recreates  $I_{\text{Ca(L)}}$ ,  $I_{\text{rel}}$ , and  $[\text{Ca}^{2+}]_i$  that corresponds well to experimentally measured data at a variety of test potentials and pacing rates (see Faber et al. [18]). However, the model is

not formulated to reproduce properties of the cell at the microscopic level of spark formation. For this reason, we cannot investigate a possible mechanism of the initiation of SOICR due to stochastic openings of RyR channels as a result of elevated diastolic  $\text{Ca}^{2+}$ .

### **CASQ2 Mutation**

We model the effects of the CASQ2 mutation D307H associated with CPVT in homozygous carriers as a reduction in total  $\text{Ca}^{2+}$  binding capacity of CASQ2. In a study by Viatchenko-Karpinski et al. [19], rat ventricular myocytes expressing  $\text{CASQ2}^{\text{D307H}}$  via adenoviral gene transfer exhibited caffeine induced  $\text{Ca}^{2+}$  fluorescence signals which had amplitude 41% of control. A similar reduction in the amplitude of CaT fluorescence signals was observed during square voltage pulses from -50 mV to 0 mV applied for 400 ms every minute. In accordance with these experiments, in our simulations we assume a 60% reduction in CASQ2 binding capabilities for  $\text{CASQ2}^{\text{D307H}}$ . For the same pulse protocol as the experiment, we observe a CaT amplitude generated by the mutant  $\text{CASQ2}^{\text{D307H}}$  that is 41% of control (data not shown). Changes to the model equations reflecting the CASQ2 mutation are provided in the Equations.

### **$\text{Ca}^{2+}$ Uptake and Release by Mitochondria**

We incorporated mitochondrial uptake and release of  $\text{Ca}^{2+}$  in the LRd model based upon the formulations of Roux and Marhl [20]. Modifications were made to their formulation to account for temperature differences (23°C in the experiment versus 37°C in our model) and for the larger concentration of mitochondria in ventricular myocytes

[21]. The addition of mitochondrial  $\text{Ca}^{2+}$  sequestration resulted in a slight decrease in CaT amplitude and diastolic  $[\text{Ca}^{2+}]_i$ , with the simulated contribution of mitochondria to relaxation of the CaT comparable to that measured experimentally [22].

### **Simulation Protocols**

During pacing, a stimulus of  $-80 \mu\text{A}/\mu\text{F}$  is applied for a duration of 0.5 ms. The model is paced with a conservative current stimulus carried by  $\text{K}^+$  [23]. A discrete time step of 0.0002 ms is used during computation of the AP (or during voltage clamp simulations) and 0.002 ms during the diastolic interval. APD is measured as the interval between the time of maximum upstroke velocity ( $dV/dt_{\text{max}}$ ) and 90% repolarization ( $\text{APD}_{90}$ ).

### **Ca<sub>v</sub>1.2 State Residencies During an EAD**

The process of EAD generation was shown previously in both simulations [24] and experiments [13, 25]. The Markov model of Ca<sub>v</sub>1.2 permits us to explore the mechanism of EAD generation at the level of channel kinetic states. In Supplement Fig. 3A, we show the state residencies of Ca<sub>v</sub>1.2 during the pause-induced EAD. Due to prolongation of the AP, channels which have inactivated (ModeCa and  $I_{V_s}$ ) are able to recover and return to the Open state (O), which leads to increased  $I_{\text{Ca(L)}}$  current and depolarization of the membrane potential. The membrane depolarization causes channels which have deactivated to reactivate (Closed channels ( $C_0+C_1+C_2+C_3$ ) return to the Open state), which leads to increase of  $I_{\text{Ca(L)}}$  and further elevation of the membrane potential. This positive-feedback between channel reactivation and membrane depolarization (initiated by recovery of channels from inactivated states) leads to formation of the EAD.



APD prolongation is critical for EAD formation; it allows time for channels which have inactivated to recover. If recovery from inactivation is prevented (either recovery from CDI or recovery from VDI) the EAD is abolished (Supplement Fig. 3B and 3C, respectively). The times selected to freeze the channels in their respective inactivated states correspond to peak channel occupancy in these states. For channels inactivated via CDI, this time is early ( $t = 1040$  ms; 30 ms from AP onset), with strong correlation to the time of peak CaT. For channels inactivated via VDI, this time is later in the AP ( $t = 1165$ ; 155 ms from AP onset).

## EQUATIONS

For a complete list of model equations, see Faber et al. [18]. Below are the full equations for the Ca<sub>v</sub>1.2 model and those equations which were modified for the simulations in this paper.

### Model Equations

#### A. Ca<sub>v</sub>1.2 - L-type Ca<sup>2+</sup> Channel - I<sub>Ca(L)</sub>

$$\alpha = 0.925 \cdot \exp(V_m / 30)$$

$$\beta = 0.39 \cdot \exp(-V_m / 40)$$

$$\alpha_0 = 4 \cdot \alpha$$

$$\alpha_1 = 3 \cdot \alpha$$

$$\alpha_2 = 2 \cdot \alpha$$

$$\alpha_3 = \alpha$$

$$\beta_0 = \beta$$

$$\beta_1 = 2 \cdot \beta$$

$$\beta_2 = 3 \cdot \beta$$

$$\beta_3 = 4 \cdot \beta$$

$$\gamma_f = 0.245 \cdot \exp(V_m / 10)$$

$$\gamma_s = 0.005 \cdot \exp(-V_m / 40)$$

$$\phi_f = 0.02 \cdot \exp(V_m / 500)$$

$$\phi_s = 0.03 \cdot \exp(-V_m / 280)$$

$$\lambda_f = 0.035 \cdot \exp(-V_m / 300)$$

$$\lambda_s = 0.0011 \cdot \exp(V_m / 500)$$

$$\omega_f = (\beta_3 \cdot \lambda_f \cdot \gamma_f) / (\alpha_3 \cdot \phi_f)$$

$$\omega_s = (\beta_3 \cdot \lambda_s \cdot \gamma_s) / (\alpha_3 \cdot \phi_s)$$

$$\omega_{sf} = (\lambda_s \cdot \phi_f) / \lambda_f ; \omega_{fs} = \phi_s$$

#### Ca<sub>v</sub>1.2 Differential Equations:

$$\frac{dC_0}{dt} = C_1 \cdot \beta_0 - C_0 \cdot \alpha_0$$

$$\frac{dC_1}{dt} = C_0 \cdot \alpha_0 + C_2 \cdot \beta_1 - C_1 \cdot (\alpha_1 + \beta_0)$$

$$\begin{aligned}\frac{dC_2}{dt} &= C_1 \cdot \alpha_1 + C_3 \cdot \beta_2 - C_2 \cdot (\alpha_2 + \beta_1) \\ \frac{dC_3}{dt} &= C_2 \cdot \alpha_2 + O \cdot \beta_3 + I_{Vf} \cdot \omega_f + I_{Vs} \cdot \omega_s - C_3 \cdot (\alpha_3 + \beta_2 + \gamma_f + \gamma_s) \\ \frac{dO}{dt} &= C_3 \cdot \alpha_3 + I_{Vf} \cdot \lambda_f + I_{Vs} \cdot \lambda_s - O \cdot (\beta_3 + \phi_f + \phi_s) \\ \frac{dI_{Vf}}{dt} &= C_3 \cdot \gamma_f + O \cdot \phi_f + I_{Vs} \cdot \omega_{sf} - I_{Vf} \cdot (\omega_f + \lambda_f + \omega_{fs}) \\ \frac{dI_{Vs}}{dt} &= C_3 \cdot \gamma_s + O \cdot \phi_s + I_{Vf} \cdot \omega_{fs} - I_{Vs} \cdot (\omega_s + \lambda_s + \omega_{sf})\end{aligned}$$

**Rate to Enter ModeCa:**

$$\delta = \frac{4}{1 + 1/[Ca^{2+}]_{ss}}$$

**Rate to Leave ModeCa:**

$$\theta = 0.01$$

**CDI Gate:**

$$f_{Ca} = \frac{\theta}{\delta + \theta} - \left( \left( \frac{\theta}{\delta + \theta} - f_{Ca} \right) \cdot \exp \frac{-dt}{1/(\delta + \theta)} \right)$$

**Rate to Enter Mode0:**

$$M\theta_{on} = 0.0008$$

**Rate to Leave Mode0:**

$$M\theta_{off} = 0.00018$$

**Mode0 Gate:**

$$f_{M\theta} = \frac{M\theta_{off}}{M\theta_{on} + M\theta_{off}}$$

**Ca<sub>v</sub>1.2 Driving Force:**

$$\bar{I}_{Ca} = P_{Ca} \cdot z_{Ca}^2 \cdot \frac{V_m \cdot F^2}{RT} \cdot \frac{\gamma_{Cai} \cdot [Ca^{2+}]_{ss} \cdot \exp((z_{Ca} \cdot V_m \cdot F)/(RT)) - \gamma_{Cao} \cdot [Ca^{2+}]_o}{\exp((z_{Ca} \cdot V_m \cdot F)/(RT)) - 1}$$

$$P_{Ca} = 0.006615; \gamma_{Cai} = 0.01; \gamma_{Cao} = 0.341$$

$$\bar{I}_{Ca,Na} = P_{Na} \cdot z_{Na} \cdot \frac{V_m \cdot F^2}{RT} \cdot \frac{\gamma_{Nai} \cdot [Na^+]_{ss} \cdot \exp((z_{Na} \cdot V_m \cdot F)/(RT)) - \gamma_{Nao} \cdot [Na^+]_o}{\exp((z_{Na} \cdot V_m \cdot F)/(RT)) - 1}$$

$$P_{Na} = 8.265 \times 10^{-6}; \gamma_{Nai} = 0.75; \gamma_{Nao} = 0.75$$

$$\bar{I}_{Ca,K} = P_K \cdot z_K \cdot \frac{V_m \cdot F^2}{RT} \cdot \frac{\gamma_{Ki} \cdot [K^+]_{ss} \cdot \exp((z_K \cdot V_m \cdot F)/(RT)) - \gamma_{Ko} \cdot [K^+]_o}{\exp((z_K \cdot V_m \cdot F)/(RT)) - 1}$$

$$P_K = 2.363 \times 10^{-6}; \gamma_{Ki} = 0.75; \gamma_{Ko} = 0.75$$

### Ca<sub>v</sub>1.2 Current:

$$I_{Ca(L)} = \bar{I}_{Ca} \cdot f_{Ca} \cdot f_{M\emptyset} \cdot O$$

$$I_{Ca,Na} = \bar{I}_{Ca,Na} \cdot f_{Ca} \cdot f_{M\emptyset} \cdot O$$

$$I_{Ca,K} = \bar{I}_{Ca,K} \cdot f_{Ca} \cdot f_{M\emptyset} \cdot O$$

### B. I<sub>rel</sub>

#### Store-Overload-Induced Ca<sup>2+</sup> Release:

$$soicr_{ss} = \frac{25}{\left(1 + \exp\left(\frac{6.8 - [Ca^{2+}]_{JSR}}{0.001}\right)\right)}$$

$$soicr_{\tau} = 125$$

$$soicr = soicr_{ss} - (soicr_{ss} - soicr) \cdot \exp(-dt / soicr_{\tau})$$

$$G_{rel} = 250 \cdot \left( \frac{gradedrel}{vgainofrel} + soicr \right)$$

### C. Ca<sup>2+</sup> Uptake and Release by Mitochondria

$$\beta_{mito} = 0.0025$$

$$\rho_{mito} = 0.02$$

$$k_{in} = 8.6 \times 10^{-5}$$

$$k_{out} = 4.28 \times 10^{-3}$$

$$k_{mMito} = 1$$

$$J_{inMito} = k_{in} \cdot \frac{(1000 \cdot [Ca^{2+}]_i)^8}{K_{mMito}^8 + (1000 \cdot [Ca^{2+}]_i)^8}$$

$$J_{outMito} = k_{out} \cdot [Ca^{2+}]_m$$

$$d[Ca^{2+}]_m = dt \cdot (\beta_{Mito} / \rho_{Mito}) \cdot (J_{inMito} - J_{outMito})$$

$$[Ca^{2+}]_m = [Ca^{2+}]_m + d[Ca^{2+}]_m$$

## D. $\beta$ -adrenergic Effects

### a. Cav1.2

$$\phi_s = 0.014 \cdot \exp(-V_m / 20)$$

$$\lambda_f = 0.015 \cdot \exp(-V_m / 300)$$

$$\lambda_s = 0.0022 \cdot \exp(V_m / 500)$$

$$\delta = \frac{5}{1 + 1/[Ca^{2+}]_{ss}}$$

$$\theta = \frac{0.009}{1 + \exp(10000 \cdot [Ca^{2+}]_{ss} - 5)} + 0.001$$

$$M\theta_{on} = 0.0004$$

$$M\theta_{off} = 0.0004545$$

### b. $I_{Ks}$

$$\bar{G}_{Ks} = 0.42434 \cdot \left( 1 + \frac{0.6}{1 + (3.8 \times 10^{-5} / [Ca^{2+}]_i)^{1.4}} \right)$$

$$\tau_{xs1} = \frac{1}{\frac{7.19 \times 10^{-5} \cdot (V_m + 34)}{1 - \exp(-0.148 \cdot (V_m + 34))} + \frac{1.31 \times 10^{-4} \cdot (V_m + 34)}{\exp(0.0687 \cdot (V_m + 34)) - 1}}$$

### c. $I_{K1}$

$$\beta_{K1} = 2 + \frac{0.49124 \cdot \exp(0.08032 \cdot (V_m - E_{K1} + 5.476)) + \exp(0.06175 \cdot (V_m - E_{K1} - 594.31))}{1 + \exp(-0.5143 \cdot (V_m - E_{K1} + 4.753))}$$

**d.  $I_{NaK}$** 

$$\overline{G_{NaK}} = 2.6$$

**e. SR Fluxes**

$$\overline{I_{up}} = 0.02079 \text{ mM/ms}$$

**E. Calsequestrin Mutation**

$$\overline{[csqn]} = 4 \text{ mM}$$

**F. Initial Ionic Concentrations and Markov Model State Residencies**

End diastolic steady-state values for the model paced at CL = 1000 ms.

|                   |                                  |
|-------------------|----------------------------------|
| $[Ca^{2+}]_i$     | $8.21 \times 10^{-5} \text{ mM}$ |
| $[Ca^{2+}]_{ss}$  | $6.72 \times 10^{-5} \text{ mM}$ |
| $[Ca^{2+}]_m$     | $2.5 \times 10^{-3} \text{ mM}$  |
| $[K^+]_i$         | 137.6 mM                         |
| $[K^+]_{ss}$      | 137.6 mM                         |
| $[Na^+]_i$        | 10.71 mM                         |
| $[Na^+]_{ss}$     | 10.71 mM                         |
| $[Ca^{2+}]_{NSR}$ | 2.553 mM                         |
| $[Ca^{2+}]_{JSR}$ | 2.479 mM                         |
| $[Ca^{2+}]_o$     | 1.8 mM                           |
| $[K^+]_o$         | 4.5 mM                           |
| $[Na^+]_o$        | 130 mM                           |

**L-type  $Ca^{2+}$  Channel**

$$C_0 = 0.948$$

$$C_1 = 0.052$$

$$C_2 = 0$$

$$C_3 = 0$$

$$O = 0$$

$$I_{Vf} = 0$$

$$I_{Vs} = 0$$

**RyR**

$$C_1 = 0.890$$

$$C_2 = 0.021$$

$$C_3 = 0.003$$

$$C_4 = 0.001$$

CVR-2007-178R1

$$O = 0$$

$$I_1 = 0.082$$

$$I_2 = 0.002$$

$$I_3 = 0.001$$

$$I_4 = 0$$

$$I_5 = 0$$

## REFERENCES

- [1] Bennett PB, Begenisich TB. Catecholamines modulate the delayed rectifying potassium current (IK) in guinea pig ventricular myocytes. *Pflugers Arch* 1987;410:217-9.
- [2] Yazawa K, Kameyama M. Mechanism of receptor-mediated modulation of the delayed outward potassium current in guinea-pig ventricular myocytes. *J Physiol* 1990;421:135-50.
- [3] Bosch RF, Schneck AC, Kiehn J, Zhang W, Hambrock A, Eigenberger BW et al. beta3-Adrenergic regulation of an ion channel in the heart-inhibition of the slow delayed rectifier potassium current I(Ks) in guinea pig ventricular myocytes. *Cardiovasc Res* 2002;56:393-403.
- [4] Kockskamper J, Erlenkamp S, Glitsch HG. Activation of the cAMP-protein kinase A pathway facilitates Na<sup>+</sup> translocation by the Na<sup>+</sup>-K<sup>+</sup> pump in guinea-pig ventricular myocytes. *J Physiol* 2000;523:561-74.
- [5] Dobretsov M, Hastings SL, Stimers JR. Na<sup>(+)</sup>-K<sup>+</sup> pump cycle during beta-adrenergic stimulation of adult rat cardiac myocytes. *J Physiol* 1998;507:527-39.
- [6] Koumi S, Sato R. On the mechanism of alpha 1-adrenergic modulation of the inwardly-rectifying potassium channel gating in the human heart. *Nippon Ika Daigaku Zasshi* 1996;63:165-8.
- [7] Koumi S, Backer CL, Arentzen CE, Sato R. beta-Adrenergic modulation of the inwardly rectifying potassium channel in isolated human ventricular myocytes. Alteration in channel response to beta-adrenergic stimulation in failing human hearts. *J Clin Invest* 1995;96:2870-81.



- [8] Li L, Desantiago J, Chu G, Kranias EG, Bers DM. Phosphorylation of phospholamban and troponin I in beta-adrenergic-induced acceleration of cardiac relaxation. *Am J Physiol Heart Circ Physiol* 2000;278:H769-79.
- [9] Chaudhri B, Del Monte F, Hajjar RJ, Harding SE. Interaction between increased SERCA2a activity and beta -adrenoceptor stimulation in adult rabbit myocytes. *Am J Physiol Heart Circ Physiol* 2002;283:H2450-7.
- [10] Jiang D, Xiao B, Yang D, Wang R, Choi P, Zhang L et al. RyR2 mutations linked to ventricular tachycardia and sudden death reduce the threshold for store-overload-induced Ca<sup>2+</sup> release (SOICR). *Proc Natl Acad Sci U S A* 2004;101:13062-7.
- [11] Lipp P, Hüser J, Pott L, Niggli E. Subcellular properties of triggered Ca<sup>2+</sup> waves in isolated citrate-loaded guinea-pig atrial myocytes characterized by ratiometric confocal microscopy. *J Physiol* 1996;497:599-610.
- [12] Subramanian S, Viatchenko-Karpinski S, Lukyanenko V, Györke S, Wiesner TF. Underlying mechanisms of symmetric calcium wave propagation in rat ventricular myocytes. *Biophys J* 2001;80:1-11.
- [13] Priori SG, Corr PB. Mechanisms underlying early and delayed afterdepolarizations induced by catecholamines. *Am J Physiol* 1990;258:H1796-805.
- [14] Mamas MA, Terrar DA. Inotropic actions of protein kinase C activation by phorbol dibutyrate in guinea-pig isolated ventricular myocytes. *Exp Physiol* 2001;86:561-70.

- [15] Miura M, Ishide N, Oda H, Sakurai M, Shinozaki T, Takishima T. Spatial features of calcium transients during early and delayed afterdepolarizations. *Am J Physiol* 1993;265:H439-44.
- [16] Schlotthauer K, Bers DM. Sarcoplasmic reticulum Ca(2+) release causes myocyte depolarization. Underlying mechanism and threshold for triggered action potentials. *Circ Res* 2000;87:774-80.
- [17] Satoh H, Blatter LA, Bers DM. Effects of  $[Ca^{2+}]_i$ , SR Ca $^{2+}$  load, and rest on Ca $^{2+}$  spark frequency in ventricular myocytes. *Am J Physiol* 1997;272:H657-68.
- [18] Faber GM, Silva J, Livshitz L, Rudy Y. Kinetic Properties of the Cardiac L-type Ca $^{2+}$  Channel and its Role in Myocyte Electrophysiology: A Theoretical Investigation. *Biophys J* 2007;92:1522-43.
- [19] Viatchenko-Karpinski S, Terentyev D, Györke I, Terentyeva R, Volpe P, Priori SG et al. Abnormal calcium signaling and sudden cardiac death associated with mutation of calsequestrin. *Circ Res* 2004;94:471-7.
- [20] Roux E, Marhl M. Role of sarcoplasmic reticulum and mitochondria in Ca $^{2+}$  removal in airway myocytes. *Biophys J* 2004;86:2583-95.
- [21] Bers DM: **Excitation-Contraction Coupling and Cardiac Contractile Force**, 2nd Edition edn. Dordrecht, The Netherlands: Kluwer Academic Publishers; 2001.
- [22] Bassani RA, Bassani JW, Bers DM. Mitochondrial and sarcolemmal Ca $^{2+}$  transport reduce  $[Ca^{2+}]_i$  during caffeine contractures in rabbit cardiac myocytes. *J Physiol* 1992;453:591-608.

- [23] Hund TJ, Kucera JP, Otani NF, Rudy Y. Ionic charge conservation and long-term steady state in the Luo-Rudy dynamic cell model. *Biophys J* 2001;81:3324-31.
- [24] Zeng J, Rudy Y. Early afterdepolarizations in cardiac myocytes: mechanism and rate dependence. *Biophys J* 1995;68:949-64.
- [25] January CT, Riddle JM. Early afterdepolarizations: mechanism of induction and block. A role for L-type Ca<sup>2+</sup> current. *Circ Res* 1989;64:977-90.

**FIGURE CAPTIONS**

**FIGURE E1** State residencies of the L-type  $\text{Ca}^{2+}$  channel during the time course of the action potential at CL = 500 ms in the absence of ISO (black curve) and in the presence of ISO (grey curve). For identification of the channel states, refer to Paper Fig. 1B.

**FIGURE E2** Effect of CASQ2 buffering capacity on **(A)** peak  $[\text{Ca}^{2+}]_i$ , **(B)** free  $\text{Ca}^{2+}$  in the JSR, and **(C)** total  $\text{Ca}^{2+}$  in the SR ( $[\text{Ca}^{2+}]_{\text{JSR}} + \text{Ca}^{2+}$  bound CASQ2). The model is paced for 5 minutes at CL = 1500 ms (black curves) and CL = 500 ms (grey curves) in the absence of ISO. CASQ2 buffering capacity of 10 corresponds to WT conditions and CASQ2 buffering capacity of 4 corresponds to a 60% reduction in buffering capacity as observed with the mutation CASQ2<sup>D307H</sup>.

**FIGURE E3** EAD generation is abolished by preventing  $I_{\text{Ca(L)}}$  recovery from inactivation. **Panels A-C** (top to bottom): post-pause APs with corresponding  $I_{\text{Ca(L)}}$ ,  $\text{Ca}_v1.2$  closed-state residency ( $C_0+C_1+C_2+C_3$ ), open-state residency (O), slow VDI state residency ( $I_{V_s}$ ), and the fraction of channels which undergo CDI (ModeCa). Data are generated utilizing the same pacing protocol as Fig. 6. In **Panel B** recovery from CDI is prevented ( $\theta = 0$  and  $\delta = 0$  in the simulation) while in **Panel C** recovery from VDI is prevented (all transition rates into and out of  $I_{V_f}$  and  $I_{V_s}$  are set to 0). In these simulations, recovery from CDI or VDI is prevented when the number of channels inactivated via that mechanism has reached a maximum ( $t = 1040$  ms and  $t = 1165$  ms, respectively). Note that in both cases the EAD is abolished. The inset in **Panel A** shows

CVR-2007-178R1

Open-state residency during the EAD on a magnified scale. For identification of the channel states, refer to Paper Fig. 1B.

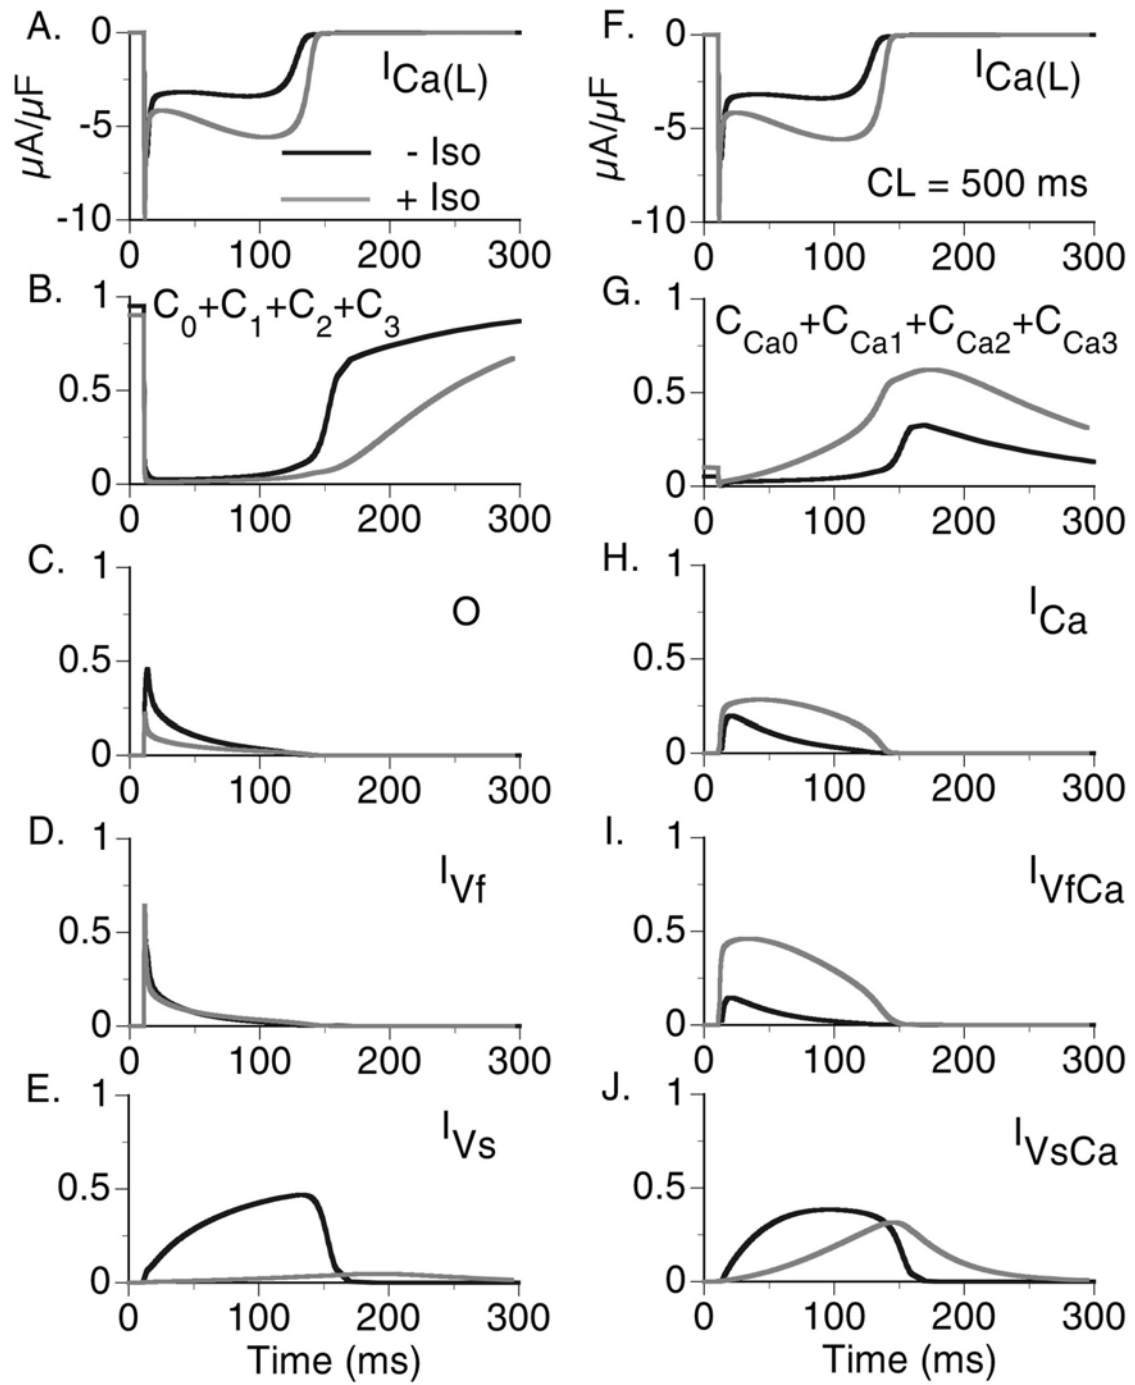

Fig. E1

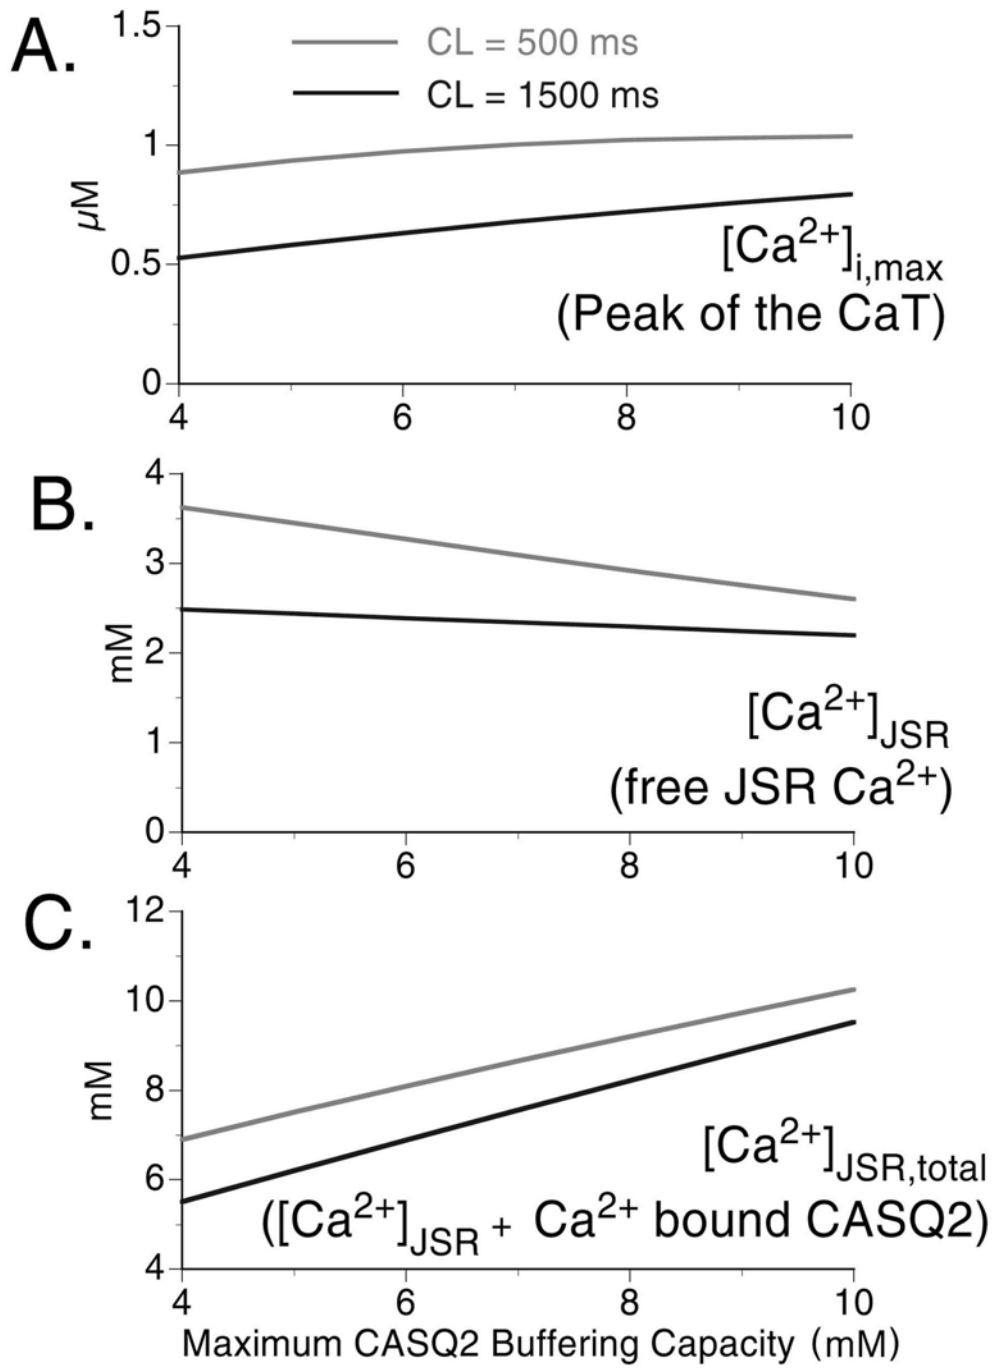

Fig. E2

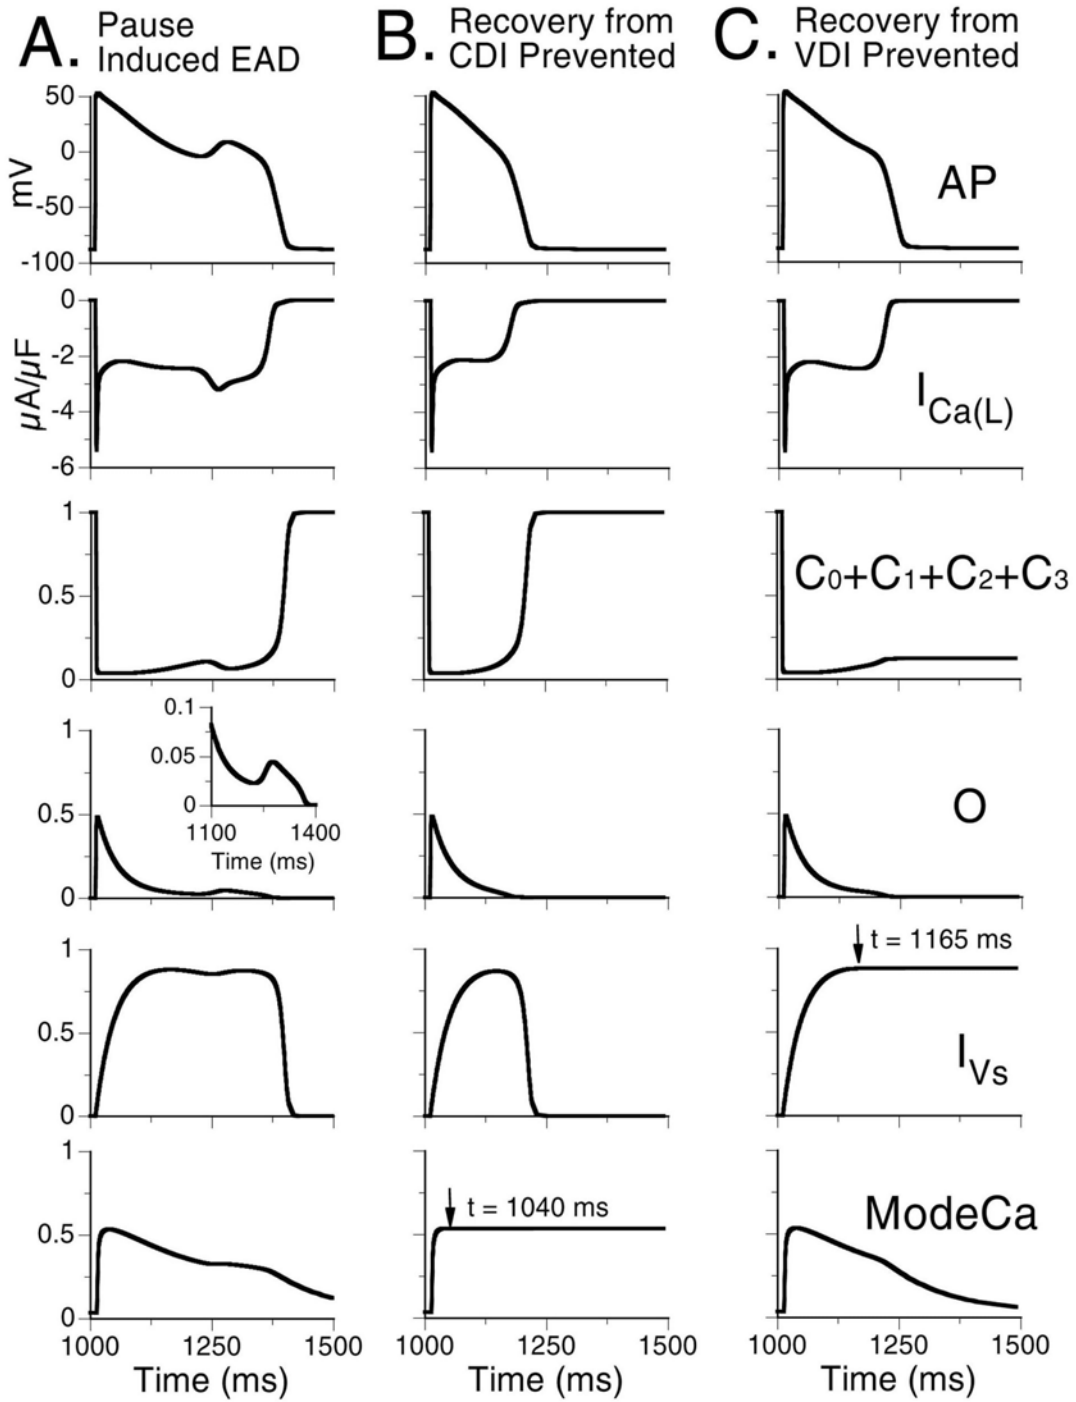

Fig. E3
